# Supplementary material for: Psychological resilience and active aging among older people with mobility limitations
Source: Springer Nature journal article supplement (doi:10.1007/s10433-020-00569-4), 2020-05-04
Supplement: MOESM1 [file 17952586]

Psychological resilience and active aging among older people with mobility decline

in European Journal of Ageing

Sini Siltanen<sup>1</sup>, Anu Tourunen, Milla Saajanaho, Lotta Palmberg, Erja Portegijs, Taina Rantanen

<sup>1</sup> Gerontology Research Center, Faculty of Sport and Health Sciences, University of Jyväskylä, Finland

[sini.k.t.siltanen@jyu.fi](mailto:sini.k.t.siltanen@jyu.fi)

**Supplementary Table 1.** Correlates of active aging (UJACAS 0-272), 2km walking difficulties (no difficulties, difficulties, unable to walk), and resilience (CD-RISC10, 0-40).

|                           | Active aging |                   | Walking difficulty |      | Resilience |                             |
|---------------------------|--------------|-------------------|--------------------|------|------------|-----------------------------|
|                           | N            | r                 | N                  | r    | N          | r                           |
| <i>Covariates</i>         |              |                   |                    |      |            |                             |
| Years of education        | 996          | .22 <sup>a</sup>  | 990                | -.10 | 964        | .03 <sup>a</sup> <i>ns</i>  |
| Cognitive function        | 1003         | .34 <sup>a</sup>  | 988                | -.14 | 965        | -.03 <sup>a</sup> <i>ns</i> |
| Age                       | 1010         | -.27 <sup>a</sup> | 994                | .22  | 970        | -.06 <sup>a</sup> <i>ns</i> |
| No. of chronic conditions | 1009         | -.24 <sup>a</sup> | 993                | .36  | 969        | -.12 <sup>a</sup>           |
| Sex                       | 1010         | .03 <i>ns</i>     | 994                | .11  | 970        | -.05 <i>ns</i>              |
| Living alone              | 1010         | .14               | 994                | -.19 | 970        | .03 <i>ns</i>               |
| <i>Main variables</i>     |              |                   |                    |      |            |                             |
| Walking difficulties      | 989          | -.36              | -                  | -    | 961        | -.12                        |
| Resilience                | 969          | .42 <sup>a</sup>  | 961                | -.12 | -          | -                           |

<sup>a</sup> Tested with Pearson's correlation. Other correlations describe Spearman's rho.

*ns* = non-significant. Statistical significance of other correlations was  $p \leq .001$ .

**Supplementary Table 2.** Ordinary least squares path analyses with sex and age as moderators of the relationship between resilience or 2km walking difficulties and active aging (UJACAS, range 0-272).

|                          | N   | B     | S.E. | p    | 95% CI        |
|--------------------------|-----|-------|------|------|---------------|
| Age * Resilience         | 969 | .13   | .05  | .005 | .04, .22      |
| Age * No difficulty      | 989 | .00   | ref. | ref. | ref.          |
| Age * Walking difficulty |     | -1.30 | .56  | .02  | -2.40, -.21   |
| Age * Inability to walk  |     | 1.44  | .87  | .10  | -.27, 3.15    |
| Sex * Resilience         | 969 | -.48  | .36  | .19  | -1.19, .24    |
| Sex * No difficulty      | 989 | .00   | ref. | ref. | ref.          |
| Sex * Walking difficulty |     | 4.26  | 4.24 | .32  | -4.07, 12.59  |
| Sex * Inability to walk  |     | -2.88 | 7.10 | .69  | -16.80, 11.05 |
